## REGULATION OF REPRESSIBLE ACID PHOSPHATASE BY CYCLIC AMP IN *SACCHAROMYCES CEREVISIAE*

KUNIHRO MATSUMOTO,\* ISAO UNO<sup>†</sup> and TATSUO ISHIKAWA<sup>†</sup>

\**Department of Industrial Chemistry, Tottori University, Tottori-shi, Tottori 680, Japan, and* <sup>†</sup>*Institute of Applied Microbiology, University of Tokyo, Bunkyo-ku, Tokyo 113, Japan*

Manuscript received August 1, 1983

Revised copy accepted April 25, 1984

### ABSTRACT

One of the *cyr1* mutants (*cyr1-2*) in yeast produced low levels of adenylate cyclase and cyclic AMP at 25° and was unable to derepress acid phosphatase. Addition of cyclic AMP to the *cyr1-2* cultures elevated the level of repressible acid phosphatase activity. The *bcy1* mutation, which suppresses the *cyr1-2* mutation by allowing activity of a cyclic AMP-independent protein kinase, also allows acid phosphatase synthesis without restoring adenylate cyclase activity. The *CYR3* mutant had structurally altered cyclic AMP-dependent protein kinase and was unable to derepress acid phosphatase. The *cyr1* locus was different from *pho2*, *pho4* and *pho81*, which were known to regulate acid phosphatase synthesis. Mutants carrying *cyr1-2* and *pho80*, *PHO81<sup>c</sup>*, *PHO82* or *pho85* mutations, which confer constitutive synthesis of repressible acid phosphatase, produced acid phosphatase. The *cyr1-2* mutant produced significantly low levels of invertase and  $\alpha$ -D-glucosidase. These results indicated that cyclic AMP-dependent protein kinase exerts its function in the synthesis of repressible acid phosphatase and other enzymes.

CYCLIC AMP (cAMP) has been shown to be involved in the control of a variety of metabolic processes in eukaryotes as well as prokaryotes (ROBISON, BUTCHER and SUTHERLAND 1971). Evidence to show cAMP action in *Saccharomyces cerevisiae* has been obtained by isolating mutants altered in cAMP metabolism. Yeast mutants deficient in adenylate cyclase activity (*cyr1*) require cAMP for growth (MATSUMOTO *et al.* 1982a). Other mutants altered in the regulatory subunit of cAMP-dependent protein kinase (*CYR3*) also require cAMP (UNO, MATSUMOTO and ISHIKAWA 1982). Our studies on these mutants indicated that cAMP is an essential factor for yeast cells to proceed through the cell cycle via the activation of cAMP-dependent protein kinase (MATSUMOTO *et al.* 1982a; MATSUMOTO, UNO and ISHIKAWA 1983). In addition, it is known that cAMP is involved in controlling the expression of genes regulated at the level of transcription in prokaryotes and eukaryotes (PASTAN and ADHYA 1976; WILLIAMS, TSANG and MAHBUBANI 1980; CHRAPKIEWICZ, BEALE and GRANNER 1982). It has been shown that cAMP may not be involved in catabolite repression but has a stimulative effect on constitutive synthesis of some enzymes in yeast (MATSUMOTO *et al.* 1982b, 1983). However, the regulatory role of cAMP on gene expression in yeast is not yet clear.

The repressible acid phosphatase system in *S. cerevisiae* offers a unique opportunity to investigate the effect of cAMP in gene expression. *S. cerevisiae* has two species of acid phosphatase (EC 3.1.3.2); one is a constitutive enzyme coded by the *PHO3* gene, and the other is a repressible enzyme coded by the *PHO5* gene (TOH-E *et al.* 1973; TOH-E, KAKIMOTO and OSHIMA 1975). Synthesis of repressible acid phosphatase is negatively controlled by  $P_i$  levels present in the growth medium (TOH-E *et al.* 1973). The repression of enzyme synthesis has been shown by TOH-E, INOUE and OSHIMA (1982) to be regulated by the *PHO2*, *PHO4*, *PHO80*, *PHO81* and *PHO85* genes. Strong support for transcriptional regulation of the acid phosphatase gene has been provided by recent demonstrations that synthesis of mRNA for repressible acid phosphatase polypeptides was controlled by  $P_i$  and that several yeast genes under  $P_i$  control were isolated (BOSTIAN *et al.* 1980; KRAMER and ANDERSEN 1980; ROGERS, LEMIRE and BOSTIAN 1982).

In this paper, we report that one of the cAMP-requiring mutants (*cyr1-2*) lacks production of the repressible acid phosphatase under conditions that permit slow growth and describe the involvement of cAMP-dependent protein kinase in the synthesis of repressible acid phosphatase.

#### MATERIALS AND METHODS

*Yeast strains:* The *S. cerevisiae* strains used in this study were derived from the *pho3-1* strain (P-28-24C) (KANEKO, TOH-E and OSHIMA 1982) and are listed in Table 1. All strains except for 038-M58 and AM163-1A carry the *pho3-1* mutation to eliminate the constitutive acid phosphatase activity (TOH-E *et al.* 1973; TOH-E, KAKIMOTO and OSHIMA 1975).

*Media:* General usage and composition of minimal, YPGlu, YPGly, YPGlyMal and sporulation media were described previously (NOGI *et al.* 1977; MATSUMOTO, TOH-E and OSHIMA 1981). Low- $P_i$  medium was prepared by the method of RUBIN (1974) with minor modification; 10 g of yeast extract (Difco laboratories) and 20 g of peptone (Difco Laboratories) were dissolved in deionized water to a volume of 1 liter, and to this was added 10 ml of 1 M  $MgSO_4$  and then 10 ml of concentrated ammonium hydroxide. The solution was mixed well and left to stand at room temperature for 30 min. The precipitate formed was removed by filtration with Whatman no. 1 filter paper. The filtrate was supplemented with 20 g of glucose after adjustment to pH 5.8 by dropwise addition of concentrated HCl, and the whole solution was autoclaved for sterilization. High- $P_i$  medium was low- $P_i$  medium plus 2 g of  $KH_2PO_4$  per liter. Low- $P_i$ -cAMP and high- $P_i$ -cAMP media were low- $P_i$  and high- $P_i$  media supplemented with filter-sterilized cAMP (1 mM), respectively. Minimal low- $P_i$  medium was the same as Burkholder's synthetic medium in which L-asparagine alone is used as nitrogen source and 1.5 g of  $KH_2PO_4$  was replaced by 30 mg of  $KH_2PO_4$  and 1.5 g of KCl (TOH-E *et al.* 1973).

*Genetic techniques:* The methods for genetic analyses were described by NOGI *et al.* (1977).

*Detection of phosphatase activity of colonies:* Acid phosphatase activity of colonies grown on agar media was detected by a staining method based on the diazo-coupling reaction (TOH-E and OSHIMA 1974).

*Preparation of cell-free extract:* All experiments were carried out at 4°. Cells grown at 25° for 24 hr with shaking were harvested by centrifugation and suspended in buffer T containing 50 mM Tris-HCl buffer (pH 7.4), 1 mM EDTA, 1 mM mercaptoethanol and 0.5 mM phenylmethylsulfonylfluoride. The suspension obtained was homogenized with an Aminco French pressure cell press (J5-598A) at 10,000 psi. The resulting homogenate was centrifuged at 1000 × g for 10 min. The supernatant fluid was used as a crude extract.

*Enzyme assays:* Adenylate cyclase was assayed as described by UNO, NYUNOYA and ISHIKAWA (1981). One unit of the enzyme activity was defined as the amount that produced 1 pmol of cAMP in 1 min at 30°. The activity of acid phosphatase was assayed using intact cells as the enzyme

TABLE 1

*List of yeast strains used*

| Strain   | Genotype                                            | Source (reference)                             |
|----------|-----------------------------------------------------|------------------------------------------------|
| AL224-4A | <b>a</b> <i>pho3-1 leu1</i>                         | KANEKO, TOH-E and OSHIMA (1982)                |
| F10D     | $\alpha$ <i>pho3-1</i>                              | MATSUMOTO, TOH-E and OSHIMA (1978)             |
| G435-5B  | $\alpha$ <i>pho3-1 leu1</i>                         | MATSUMOTO, UNO and ISHIKAWA (1983)             |
| KYC95    | <b>a</b> <i>pho3-1 PHO83 trp5</i>                   | Obtained from Y. KANEKO                        |
| KYC146   | $\alpha$ <i>pho3-1 pho85 arg6 leu1</i>              | Obtained from Y. KANEKO                        |
| KYC168   | $\alpha$ <i>pho3-1 pho80-3 his6</i>                 | Obtained from Y. KANEKO                        |
| KYC188   | $\alpha$ <i>pho3-1 PHO81<sup>c</sup> his2 cdc14</i> | Obtained from Y. KANEKO                        |
| 038-M58  | <b>a</b> <i>PHO3+</i>                               | Obtained from A. TOH-E                         |
| P178-6C  | <b>a</b> <i>pho3-1 PHO82-7</i>                      | TOH-E, INOUE and OSHIMA (1981)                 |
| AM9-8B   | <b>a</b> <i>bcy1 pho3-1</i>                         | MATSUMOTO <i>et al.</i> (1982)                 |
| AM26-2A  | <b>a</b> <i>cyr1-2 pho3-1</i>                       | MATSUMOTO, UNO and ISHIKAWA (1983)             |
| AM33-1A  | <b>a</b> <i>CYR3-1 pho3-1 leu1</i>                  | UNO, MATSUMOTO and ISHIKAWA (1982)             |
| AM69-7D  | $\alpha$ <i>bcy1 pho3-1 leu1</i>                    | MATSUMOTO, UNO and ISHIKAWA (1983)             |
| AM70-1D  | $\alpha$ <i>cyr1-2 pho3-1 leu1</i>                  | MATSUMOTO, UNO and ISHIKAWA (1983)             |
| AM81-1C  | $\alpha$ <i>cyr1-2 bcy1 pho3-1</i>                  | Segregant from AM26-2A $\times$ AM69-7D        |
| AM104-1C | $\alpha$ <i>cyr1-2 pho3-1 leu1</i>                  | Segregant from AM26-2A $\times$ G435-5B        |
| AM110-4C | $\alpha$ <i>cyr1-2 pho3-1 leu1</i>                  | Segregant from AM70-1D $\times$ AL224-4A       |
| AM110-4D | <b>a</b> <i>cyr1-2 pho3-1 leu1</i>                  | Haploid clone from the same family of AM110-4C |
| AM139-5B | $\alpha$ <i>cyr1-2 pho3-1 pho80-3</i>               | Segregant from KYC168 $\times$ AM110-4D        |
| AM140-1C | $\alpha$ <i>cyr1-2 pho3-1 PHO81<sup>c</sup></i>     | Segregant from KYC188 $\times$ AM110-4D        |
| AM141-1A | $\alpha$ <i>cyr1-2 pho3-1 PHO82-7</i>               | Segregant from P178-6C $\times$ AM110-4C       |
| AM142-5C | $\alpha$ <i>cyr1-2 pho3-1 PHO83</i>                 | Segregant from KYC95 $\times$ AM110-4C         |
| AM143-1C | $\alpha$ <i>cyr1-2 pho3-1 pho85 leu1</i>            | Segregant from KYC146 $\times$ AM110-4D        |
| AM163-1A | <b>a</b> <i>cyr1-2 PHO3+</i>                        | Segregant from 038-M58 $\times$ AM110-4C       |

source and *p*-nitrophenylphosphate as the substrate, as described by TOH-E *et al.* (1973). Cells cultivated in YPGlu medium by shaking at 25° for 24 hr were harvested, washed and suspended in the same volume of sterilized water. A portion of the cell suspension was inoculated into the indicated medium to the initial optical density at 660 nm (OD<sub>660</sub>) of about 0.05 and shaken at 25°. Measurements of acid phosphatase activity were made on cultures with an OD<sub>660</sub> of 1.5–2.0. One unit of acid phosphatase was defined as the amount of enzyme that liberates 1  $\mu$ mol of *p*-nitrophenol per min under the assay conditions. Invertase and  $\alpha$ -D-glucosidase activities were determined and expressed as described previously (MATSUMOTO, TOH-E and OSHIMA 1981).

*cAMP assay:* cAMP content was measured by using a cAMP assay kit (Amersham International) as described by UNO, NYUNOYA and ISHIKAWA (1981).

*Photoaffinity labeling:* The amount of cAMP-binding protein was measured by the 8-azidoadenosine 3':5'-[<sup>32</sup>P]monophosphate (8-N<sub>3</sub>-[<sup>32</sup>P]cAMP) (ICN) photoaffinity labeling method described by WALTER *et al.* (1977).

*Protein measurement:* Protein was measured by the method of LOWRY *et al.* (1951) using bovine serum albumin as the standard.

## RESULTS

*Acid phosphatase levels in cyr1-2 mutants:* MIZUNAGA (1980) demonstrated previously that cAMP promoted acid phosphatase synthesis in yeast and was unable to overcome repression of the enzyme synthesis by inorganic phosphate. We have isolated a temperature-sensitive cAMP-requiring mutant, *cyr1-2*, in yeast and investigated the effect of cAMP on acid phosphatase synthesis. This

TABLE 2

*Acid phosphatase activity, adenylate cyclase activity and cAMP level of wild-type and mutant strains*

| Strain   | Relevant genotype    | Acid phosphatase (units/OD <sub>660 nm</sub> ) |                          |                     |                           | YPGlu                                |                              |
|----------|----------------------|------------------------------------------------|--------------------------|---------------------|---------------------------|--------------------------------------|------------------------------|
|          |                      | Low P <sub>i</sub>                             | Low-P <sub>i</sub> -cAMP | High-P <sub>i</sub> | High-P <sub>i</sub> -cAMP | Adenylate cyclase (units/mg protein) | cAMP level (pmol/mg protein) |
| 038-M58  | + <i>PHO3+</i>       | 0.11                                           | 0.14                     | 0.02                | 0.02                      | 6.7                                  | 1.9                          |
| AM163-1A | <i>cyr1-2 PHO3+</i>  | 0.01                                           | 0.02                     | 0.01                | 0.02                      | 0.2                                  | 0.2                          |
| F10D     | + <i>pho3-1</i>      | 0.14                                           | 0.17                     | <0.01               | <0.01                     | 6.6                                  | 2.0                          |
| AM110-4D | <i>cyr1-2 pho3-1</i> | <0.01                                          | 0.06                     | <0.01               | <0.01                     | 0.3                                  | 0.4                          |
| AM9-8B   | <i>bcy1 pho3-1</i>   | 0.13                                           | 0.13                     | <0.01               | <0.01                     | 6.9                                  | 1.9                          |
| AM33-1A  | <i>CYR3-1 pho3-1</i> | <0.01                                          | 0.02                     | <0.01               | <0.01                     | 7.8                                  | 2.1                          |

mutant is able to grow on YPGlu medium at 25° but requires cAMP for growth at 35°. The *cyr1-2* mutant cells grown at 25° produced significantly low levels of adenylate cyclase activity and cAMP (Table 2), and those grown at 35° produced no detectable adenylate cyclase and cAMP. The *cyr1* mutants carry lesions in the structural gene for adenylate cyclase (MATSUMOTO, UNO and ISHIKAWA 1984). The mutant strain AM163-1A (*cyr1-2 PHO3+*) possessed the same level of constitutive acid phosphatase activity as the wild-type strain 038-M58 (*CYR1+ PHO3+*) under repressed conditions at 25° (Table 2). Strain 038-M58 was derepressed for acid phosphatase activity, whereas AM163-1A was not. Strain F10D (*CYR1+ pho3-1*) and AM110-4D (*cyr1-2 pho3-1*) had no constitutive acid phosphatase under repressed conditions at 25° (Table 2). Strain F10D was derepressed for acid phosphatase, but AM110-4D produced no detectable level of acid phosphatase activity even under derepressing conditions at 25° (Table 2). These results suggest that the *cyr1-2* mutant was apparently unable to derepress acid phosphatase. Addition of cAMP to the growth media elevated the levels of repressible acid phosphatase activity in the wild-type and *cyr1-2* strains (Table 2).

Diploid strain (AM148) constructed by a cross of AM110-4D (a *cyr1-2 pho3-1*) with F10D ( $\alpha$  *CYR1+ pho3-1*) was sporulated, and four-spored asci were dissected. Tetrad analysis of the diploid showed a 4+:0- segregation for growth on YPGlu medium at 25° in the 18 asci tested, whereas they showed a 2+:2- segregation on the same medium at 35°. Six of 18 tetrads were randomly selected, and the Pho phenotype and growth characteristics of segregants were determined as shown in Figure 1. Segregation of the Pho phenotype in the 18 asci tested was 2+:2- on low-P<sub>i</sub> and minimal low-P<sub>i</sub> media at 25°, and they gave only parental ditype with regard to the Pho<sup>-</sup> phenotype and growth on YPGlu medium at 35°. These results indicate that the *cyr1-2* mutation affects synthesis of repressible acid phosphatase.

To confirm that the *cyr1-2* mutant cannot derepress acid phosphatase, the time course of acid phosphatase appearance in cultures of the wild-type

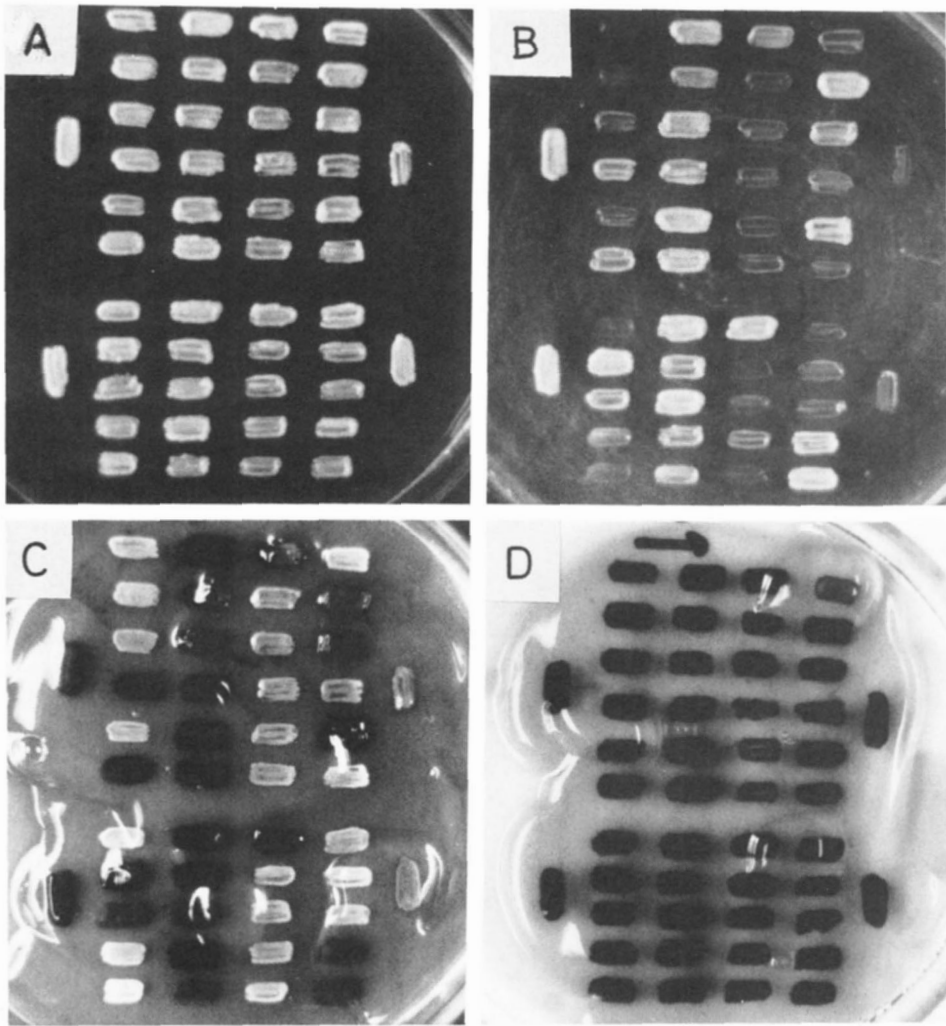

FIGURE 1.—Segregation in tetrads derived from *cyr1-2/+* and *CYR3-1/+* diploids. Streaks of the mutant and the wild-type cells are on the left and right, respectively. Horizontal groups of four are members of one tetrad. Six tetrads shown in the upper part of each plate were derived from diploids constructed by the AM110-4D (*a cyr1-2 pho3-1*)  $\times$  F10D (*a CYR3+ pho3-1*) cross, and five tetrads shown in the lower part were derived from diploids constructed by the AM33-1A (*a CYR3-1 pho3-1*)  $\times$  G435-5B (*a CYR3+ pho3-1*) cross. All plates were incubated for 24 hr. A, Cell growth on YPGlu medium at 25°. B, Cell growth on YPGlu medium at 35°. C, Acid phosphatase activity tested by the staining method on low- $P_i$  medium at 25°. D, Acid phosphatase activity tested by the staining method on low- $P_i$ -cAMP medium at 25°. Mutants streaks are white, and wild-type streaks are red on low- $P_i$  medium.

(AM148-1C) and *cyr1-2* (AM148-1D) segregants grown in low- $P_i$  and low- $P_i$ -cAMP media was examined (Figure 2). The *cyr1-2* cells grew more slowly than the wild-type cells in low- $P_i$  medium at 25°; the generation time of the *cyr1-2* cells was prolonged to 4 hr, in comparison with that of the wild-type cells of 2.5–3 hr. The *cyr1-2* cells were unable to derepress acid phosphatase even

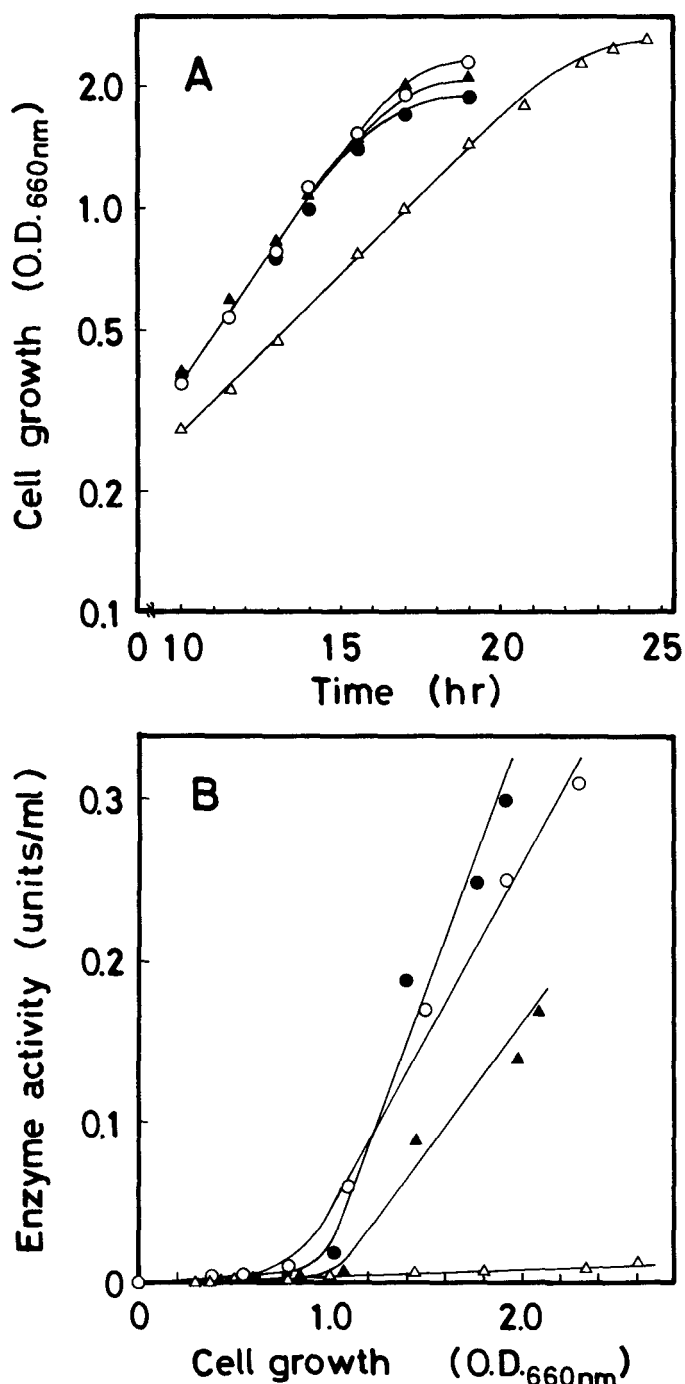

FIGURE 2.—Time courses of growth and acid phosphatase synthesis in wild-type and *cyr1-2* mutant strains. Cells of strain AM148-1C (wild type, ○ and ●) and AM148-1D (*cyr1-2*, Δ and ▲) were shaken at 25° for 24 hr in YPGlu medium. Cells were harvested, washed and suspended in the same volume of sterilized water. A, A portion of the cell suspension was inoculated into 100 ml of low-P<sub>i</sub> (○, Δ) or low-P<sub>i</sub>-cAMP (●, ▲) media at the initial OD<sub>660</sub> of about 0.05 and shaken at 25°. B, Acid phosphatase activity as a function of cell growth (OD<sub>660</sub>) was determined by using an intact-cell suspension as the enzyme source.

when the mutant cells attained the same level of stationary growth as that of wild-type cells after prolonged incubation in low- $P_i$  medium without cAMP.

The *cyr1-2* strain (AM148-1D) was grown in low- $P_i$  medium at 25°. When the culture reached an  $OD_{660}$  of 1.6, cAMP was added to the culture, and the culture was divided into two parts. Cycloheximide (final concentration, 1  $\mu$ g/ml) was added to one of the two parts. After 5 hr of incubation, the acid phosphatase activity in the absence of cycloheximide was increased from 0.004 to 0.058 unit/ml. The increase in acid phosphatase activity by addition of cAMP was not observed in the presence of cycloheximide.

The  $Pho^-$  phenotype of *cyr1-2* is similar to that of *pho2*, *pho4* and *pho81* mutations, which confer the inability to derepress acid phosphatase. *pho2* and *pho4* have been recently mapped on the left arm of chromosome IV and the right arm of chromosome VI, respectively (TOH-E 1980); *pho81* is located on the right arm of chromosome VII (A. TOH-E, personal communication). On the other hand, we found that *cyr1* was located on the right arm of chromosome X (MATSUMOTO *et al.* 1982a). The *cyr1-2* mutation complements *pho2*, *pho4* and *pho81* mutations with regard to the  $Pho^-$  phenotype on low- $P_i$  medium at 25°, indicating that the *cyr1-2* mutation was different from these  $Pho^-$  mutations (data not shown).

*Suppression of the  $Pho^-$  phenotype of *cyr1-2* mutants by the *bcy1* mutation:* In our previous report, the *bcy1* mutant was found to bypass the *cyr1* defect without restoring the adenylate cyclase activity (MATSUMOTO *et al.* 1982a). The *bcy1* mutation results in the deficiency of cAMP-binding activity of cAMP-dependent protein kinase (Table 3; MATSUMOTO *et al.* 1982a). Strain AM9-8B (a *bcy1 pho3-1*) can be derepressed for acid phosphatase activity; addition of cAMP does not further increase acid phosphatase activity (Table 2). The result indicates that the *bcy1* mutation does not affect the derepression of repressible acid phosphatase.

Diploids constructed by crossing AM26-2A (a *cyr1-2 pho3-1*) to AM69-7D ( $\alpha$  *bcy1 pho3-1*) were analyzed. Three ascus types showing 2+:2-, 3+:1- and 4+:0- segregations for growth on YPGlu medium at 35° appeared (five, seven and one asci, respectively); at 25° all 13 asci showed 4+:0- segregation on the same medium. Three ascus types showing 2+:2-, 3+:1- and 4+:0- segregations for the  $Pho$  phenotype on low- $P_i$  medium at 25° were observed in a ratio of 5:7:1. Segregants that were able to grow at 35° showed the  $Pho^+$  phenotype. One segregant from this cross, AM81-1C (a *cyr1-2 bcy1 pho3-1*), was crossed with AM104-1C ( $\alpha$  *cyr1-2 pho3-1*), and diploids (AM105) obtained were subjected to tetrad analysis. Only one ascus type showing 2+:2- segregation for the  $Pho$  phenotype on low- $P_i$  medium at 25° appeared in 12 asci. They showed 0+:4- segregation for the  $Pho$  phenotype on high- $P_i$  medium at 25° and 2+:2- segregation for growth on YPGlu medium at 35° in all asci. Furthermore, tetrad clones of AM105-1 ascus were analyzed for acid phosphatase in low- $P_i$  medium at 25° and examined for adenylate cyclase activity, cAMP content and the amount of cAMP-binding protein in YPGlu medium at 25°. Table 3 indicates that all segregants produced similar levels of adenylate cyclase activity and cAMP, but two *cyr1-2 bcy1 pho3-1* segregants (AM105-1A and D) produced no cAMP-binding activity and derepressed acid phosphatase.

TABLE 3

*Acid phosphatase activity, adenylate cyclase activity, cAMP level and photoactivated binding of 8-N<sub>3</sub>-[<sup>32</sup>P]cAMP of tetrad segregants from AM105-1 ascus obtained from the AM81-1C × AM104-1C cross*

| Strain   | Relevant genotype         | Low-P <sub>i</sub>                             | YPGlu                                |                              |                                                                   |
|----------|---------------------------|------------------------------------------------|--------------------------------------|------------------------------|-------------------------------------------------------------------|
|          |                           | Acid phosphatase (units/OD <sub>660 nm</sub> ) | Adenylate cyclase (units/mg protein) | cAMP level (pmol/mg protein) | 8-N <sub>3</sub> -[ <sup>32</sup> P]-cAMP bound (pmol/mg protein) |
| AM105-1A | <i>cyr1-2 bcy1 pho3-1</i> | 0.09                                           | 0.3                                  | 0.5                          | <0.01                                                             |
| AM105-1B | <i>cyr1-2 + pho3-1</i>    | <0.01                                          | 0.3                                  | 0.4                          | 0.47                                                              |
| AM105-1C | <i>cyr1-2 + pho3-1</i>    | <0.01                                          | 0.2                                  | 0.5                          | 0.49                                                              |
| AM105-1D | <i>cyr1-2 bcy1 pho3-1</i> | 0.12                                           | 0.2                                  | 0.5                          | <0.01                                                             |

These results indicate that the *bcy1* mutation suppressed simultaneously the two phenotypes of the *cyr1-2* mutation, the inability to grow in the absence of cAMP and to derepress acid phosphatase.

To test effects of the *bcy1* mutation on mutations at the regulatory genes, *pho2*, *pho4* and *pho81*, diploids constructed by *bcy1* × *pho2*, *bcy1* × *pho4* and *bcy1* × *pho81* crosses were subjected to tetrad analysis. All asci obtained from these crosses showed a 2+:2- segregation pattern for derepression of acid phosphatase at 30°. The results indicate that the *bcy1* mutation does not suppress the inability to produce acid phosphatase activity of *pho2*, *pho4* and *pho81* mutants.

*Acid phosphatase production by strains carrying the CYR3 mutation: CYR3* mutants are able to grow on YPGlu medium at 25° but require cAMP for the best growth at 35°. The cAMP-dependent protein kinase activity of *CYR3* mutants shows significantly higher *K<sub>a</sub>* values for activation by cAMP than those of wild type (UNO, MATSUMOTO and ISHIKAWA 1982). The apparent *K<sub>a</sub>* of the wild-type enzyme was 0.04 μM, but that of the mutant enzyme was 0.20 μM at 25° and 2.00 μM at 35°. If the production of repressible acid phosphatase activity is dependent on the activation of protein kinase, it is expected that the acid phosphatase activity of *CYR3* mutants would be lower than that of wild-type strains. As shown in Table 2, AM33-1A (a *CYR3-1 pho3-1*) failed to derepress acid phosphatase activity at 25° but produced a significant level of acid phosphatase activity by addition of cAMP. When diploids constructed by the AM33-1A × G435-5B (α *CYR3+* *pho3-1*) cross were subjected to tetrad analysis, 4+:0- segregation for growth on YPGlu medium at 25° and 2+:2- segregation at 35° were observed for seven asci examined. Five of seven tetrads were randomly selected, and the Pho phenotype and growth characteristics of segregants were determined (Figure 1). All *CYR3-1* segregants in seven asci showed no enzyme activity on low-P<sub>i</sub> medium at 25°.

*Effects of constitutive mutations for the repressible acid phosphatase synthesis on the cyr1-2 mutation: pho80, PHO81<sup>c</sup>, PHO82, PHO83 and pho85* mutants produced acid phosphatase constitutively (Table 5). To investigate effects of these constitutive mutations on the *cyr1-2* mutation which is unable to derepress acid



TABLE 4

*Tetrad segregations in crosses between strains carrying *cyr1-2* and phosphatase regulatory mutations*

| Cross              | Diploid strain | Relevant genotype of diploid                                              | Segregation <sup>a</sup> in asci |       |       |                     |       |       |
|--------------------|----------------|---------------------------------------------------------------------------|----------------------------------|-------|-------|---------------------|-------|-------|
|                    |                |                                                                           | Low-P <sub>i</sub>               |       |       | High-P <sub>i</sub> |       |       |
|                    |                |                                                                           | 4+:0-                            | 3+:1- | 2+:2- | 2+:2-               | 1+:3- | 0+:4- |
| KYC168 × AM110-4D  | AM139          | $\alpha$ <i>pho80-3 pho3-1</i><br><b>a</b> <i>cyr1-2 pho3-1</i>           | 4                                | 1     | 4     | 9                   | 0     | 0     |
| KYC188 × AM110-4D  | AM140          | $\alpha$ <i>PHO81<sup>c</sup> pho3-1</i><br><b>a</b> <i>cyr1-2 pho3-1</i> | 2                                | 8     | 2     | 12                  | 0     | 0     |
| P178-6C × AM110-4C | AM141          | <b>a</b> <i>PHO82-7 pho3-1</i><br>$\alpha$ <i>cyr1-2 pho3-1</i>           | 3                                | 11    | 4     | 4                   | 11    | 3     |
| KYC95 × AM110-4C   | AM142          | <b>a</b> <i>PHO83 pho3-1</i><br>$\alpha$ <i>cyr1-2 pho3-1</i>             | 0                                | 0     | 14    | 2                   | 7     | 5     |
| KYC146 × AM110-4D  | AM143          | $\alpha$ <i>pho85 pho3-1</i><br><b>a</b> <i>cyr1-2 pho3-1</i>             | 4                                | 6     | 3     | 13                  | 0     | 0     |

<sup>a</sup> Each tetrad segregant was tested for its ability to produce acid phosphatase on low-P<sub>i</sub> and high-P<sub>i</sub> media by the staining method.

phosphatase, they were crossed with AM110-4C ( $\alpha$  *cyr1-2 pho3-1*) or AM110-4D (**a** *cyr1-2 pho3-1*). The resultant diploids were sporulated, and four-spored asci were dissected. Segregants from each cross were cultivated at 25° on low-P<sub>i</sub> or high-P<sub>i</sub> medium, and their acid phosphatase activity was tested by staining (Table 4). In diploids prepared from KYC168 ( $\alpha$  *pho80-3 pho3-1*) × AM110-4D, KYC188 ( $\alpha$  *PHO81<sup>c</sup> pho3-1*) × AM110-4D, and KYC146 ( $\alpha$  *pho85 pho3-1*) × AM110-4D crosses, more than two segregants per ascus could synthesize acid phosphatase on low-P<sub>i</sub> medium and there were always two constitutive spores per ascus, indicating that the *cyr1-2 pho80-3 pho3-1*, *cyr1-2 PHO81<sup>c</sup> pho3-1* and *cyr1-2 pho85 pho3-1* mutants are constitutive for enzyme production. In diploids prepared from P178-6C (**a** *PHO82-7 pho3-1*) × AM110-4C ( $\alpha$  *cyr1-2 pho3-1*), more than two segregants per ascus could produce acid phosphatase on low-P<sub>i</sub> medium but less than two segregants per ascus were constitutive, suggesting that *cyr1-2 PHO82-7 pho3-1* segregants produced the enzyme in low-P<sub>i</sub> medium but not in high-P<sub>i</sub> medium. In diploids prepared from KYC95 (**a** *PHO83 pho3-1*) × AM110-4C, a 2+:2- segregation pattern was observed for the production of acid phosphatase on low-P<sub>i</sub> medium and less than two segregants per ascus were constitutive, indicating that *cyr1-2 PHO83 pho3-1* segregants did not produce acid phosphatase in either low-P<sub>i</sub> or high-P<sub>i</sub> medium.

The mutant strains, *cyr1-2 PHO80-3 pho3-1*, *cyr1-2 PHO81<sup>c</sup> pho3-1*, *cyr1-2 PHO82-7 pho3-1*, *cyr1-2 PHO83 pho3-1* and *cyr1-2 pho85 pho3-1*, were obtained from these crosses and grown in low-P<sub>i</sub> or high-P<sub>i</sub> medium with shaking at 25°. The enzyme activity of each sample was determined by using intact cells as the enzyme source (Table 5). The mutants with *cyr1-2 pho80-3 pho3-1*, *cyr1-2 PHO81<sup>c</sup> pho3-1* and *cyr1-2 pho85 pho3-1* genotypes showed reduced but significant levels of enzyme activity in both low-P<sub>i</sub> and high-P<sub>i</sub> media. Upon

TABLE 5

*Acid phosphatase activity, adenylate cyclase activity and cAMP levels of mutant strains carrying *cyr1-2* and phosphatase regulatory mutations*

| Strain   | Relevant genotype                      | Acid phosphatase<br>(units/OD <sub>660 nm</sub> ) |                     | YPGlu                                         |                                       |
|----------|----------------------------------------|---------------------------------------------------|---------------------|-----------------------------------------------|---------------------------------------|
|          |                                        | Low-P <sub>i</sub>                                | High-P <sub>i</sub> | Adenylate<br>cyclase<br>(units/mg<br>protein) | cAMP<br>level<br>(pmol/mg<br>protein) |
| KYC168   | + <i>pho80-3 pho3-1</i>                | 0.29                                              | 0.29                | 4.7                                           | 1.9                                   |
| AM139-5B | <i>cyr1-2 pho80-3 pho3-1</i>           | 0.07                                              | 0.08                | 0.3                                           | 0.2                                   |
| KYC188   | + <i>PHO81<sup>c</sup> pho3-1</i>      | 0.23                                              | 0.07                | 4.9                                           | 1.4                                   |
| AM140-1C | <i>cyr1-2 PHO81<sup>c</sup> pho3-1</i> | 0.08                                              | 0.06                | 0.2                                           | 0.4                                   |
| PI78-6C  | + <i>PHO82-7 pho3-1</i>                | 0.25                                              | 0.02                | 3.4                                           | 1.8                                   |
| AM141-1A | <i>cyr1-2 PHO82-7 pho3-1</i>           | 0.05                                              | <0.01               | 0.2                                           | 0.5                                   |
| KYC95    | + <i>PHO83 pho3-1</i>                  | 0.08                                              | 0.04                | 8.8                                           | 1.9                                   |
| AM142-5C | <i>cyr1-2 PHO83 pho3-1</i>             | <0.01                                             | 0.01                | 0.2                                           | 0.5                                   |
| KYC146   | + <i>pho85 pho3-1</i>                  | 0.13                                              | 0.10                | 9.2                                           | 2.5                                   |
| AM143-1C | <i>cyr1-2 pho85 pho3-1</i>             | 0.10                                              | 0.11                | 0.1                                           | 0.8                                   |

incubation in low-P<sub>i</sub> medium, the *cyr1-2 PHO82-7 pho3-1* mutant showed low levels of enzyme activity, whereas it was repressed in high-P<sub>i</sub> medium. The *cyr1-2 PHO83 pho3-1* was repressed for acid phosphatase in both low-P<sub>i</sub> and high-P<sub>i</sub> media. All of these mutants except *cyr1-2 pho85 pho3-1* could not grow on YPGlu medium at 35° but grew on YPGlu·cAMP medium at 35°. Since the *pho85* mutant could not grow on YPGlu medium at 35°, the *cyr1-2 pho85 pho3-1* mutant could not grow on both YPGlu and YPGlu·cAMP media at 35°. These results indicate that the constitutive mutants for acid phosphatase synthesis (except *PHO83*) suppressed partially the inability to produce acid phosphatase but did not suppress the inability to grow at 35° in strains carrying the *cyr1-2* mutation.

*Effects of the *cyr1-2* mutation on synthesis of invertase and α-D-glucosidase:* To investigate whether the *cyr1-2* mutation affects the production of enzymes other than repressible acid phosphatase, the activity levels of invertase and α-D-glucosidase were investigated. To test invertase synthesis, tetrad clones of AM148-1 ascus prepared from AM110-4D × F10D were pregrown at 25° in YPGlu medium, transferred by YPGly plus 0.2% glucose at the initial OD<sub>660</sub> of about 0.05 and harvested after 24-hr incubation in the same medium. To test clones for α-D-glucosidase production, cells grown in YPGlu medium at 25° were transferred to YPGlyMal plus 0.2% glucose at the initial OD<sub>660</sub> of about 0.05 and harvested after 24-hr incubation. The cell density of each culture showed an OD<sub>660</sub> of 1.0–2.0. As shown in Table 6, the *cyr1-2* segregants (AM148-1A and D) displayed significantly low levels of both enzymes as well as acid phosphatase at 25° in contrast to the wild-type segregants (AM148-1B and C) which produced high levels of the enzymes.

#### DISCUSSION

Strains carrying the *cyr1-2* mutation produced significantly low levels of

TABLE 6

*Acid phosphatase activity, invertase activity and  $\alpha$ -D-glucosidase activity of tetrad segregants from AM148-1 ascus obtained from the AM110-4D  $\times$  F10D cross*

| Strain   | Relevant genotype    | Acid phosphatase<br>(units/OD <sub>660 nm</sub> ) | Invertase<br>(units/OD <sub>660 nm</sub> ) | $\alpha$ -D-glucosidase<br>(units/OD <sub>660 nm</sub> ) |
|----------|----------------------|---------------------------------------------------|--------------------------------------------|----------------------------------------------------------|
|          |                      | Low-P <sub>i</sub>                                | YPGly + 0.2%<br>glucose                    | YPGlyMal +<br>0.2% glucose                               |
| AM148-1A | <i>cyr1-2 pho3-1</i> | <0.01                                             | 0.30                                       | 0.03                                                     |
| AM148-1B | + <i>pho3-1</i>      | 0.16                                              | 6.22                                       | 0.45                                                     |
| AM148-1C | + <i>pho3-1</i>      | 0.13                                              | 5.38                                       | 0.40                                                     |
| AM148-1D | <i>cyr1-2 pho3-1</i> | <0.01                                             | 0.25                                       | 0.02                                                     |

adenylate cyclase and cAMP and showed markedly reduced levels of repressible acid phosphatase, invertase and  $\alpha$ -D-glucosidase under conditions that permitted growth of *cyr1-2* in the absence of cAMP. The addition of cAMP to the culture medium of this mutant led to the production of repressible acid phosphatase. From these results cAMP is implicated to be involved in the derepression of these enzymes. Since the *cyr1-2* mutants showed reduced growth rates in YPGlu medium at 25°, there might be a possibility that the *cyr1-2* mutant showed a deficiency in enzyme derepression due to the inadequate phosphate starvation or due to the reduction of general protein synthesis. This, however, is unlikely because (1) acid phosphatase was not derepressed even when the *cyr1-2* mutant cells attained the same level of stationary growth as that of wild-type cells after prolonged incubation in the absence of cAMP (Figure 2), (2) the *cyr1-2 PHO3+* strain produced almost the same level of constitutive acid phosphatase controlled by the *PHO3* gene as that of the *CYR1+ PHO3+* strain (Table 2) and (3) constitutive mutations for repressible acid phosphatase synthesis suppressed the inability to produce the enzyme but did not suppress the inability to grow at 35° in the *cyr1-2* mutants. Production of invertase and  $\alpha$ -D-glucosidase was repressible by glucose (MATSUMOTO, TOH-E and OSHIMA 1981), but the synthesis of repressible acid phosphatase was not repressed by glucose. Therefore, it is not likely that the *cyr1-2* mutants may be defective in derepression of glucose-repressive synthesis of the enzymes in response to low concentrations of glucose.

The *bcy1* mutation suppressed the *cyr1* mutation without restoring the adenylate cyclase activity and resulted in the deficiency of regulatory subunit of cAMP-dependent protein kinase producing a high level of catalytic subunit of this enzyme (MATSUMOTO *et al.* 1982a). The *bcy1* mutation suppressed the inability to produce repressible acid phosphatase in the *cyr1-2* mutant. The increase of acid phosphatase activity by the addition of cAMP in low-P<sub>i</sub> medium was not observed in this mutant. This is explained by our finding that the cAMP-dependent protein kinase of the *bcy1* strain is cAMP independent (MATSUMOTO *et al.* 1982a). *CYR3* mutants were unable to derepress acid phosphatase, but the addition of cAMP to the culture was effective in inducing acid phosphatase activity. This result is explained satisfactorily by our previous

finding that cAMP-dependent protein kinase of *CYR3* grown at 25° is structurally altered and requires exogenous cAMP to activate the mutant enzyme (UNO, MATSUMOTO and ISHIKAWA 1982). All of these results indicate that the production of repressible acid phosphatase is dependent on activation of cAMP-dependent protein kinase by cAMP.

The *cyr1* mutant differs from other mutants (*pho2*, *pho4* and *pho81*) that are unable to derepress acid phosphatase. The *bcy1* mutation could not suppress the Pho<sup>-</sup> phenotype of these mutations. The mutants carrying *cyr1-2* mutation and the *pho80*, *PHO81<sup>c</sup>*, *PHO82* or *pho85* mutations, which confer constitutive synthesis of repressible acid phosphatase, produced repressible acid phosphatase. Recently, BOSTIAN *et al.* (1980) observed that derepression of acid phosphatase is the result of *de novo* appearance of functional mRNA followed by *de novo* protein synthesis. The participation of some of the *PHO* genes, including *PHO2*, *PHO4* and *PHO80*, in the regulation of *PHO5* transcription was further supported by KRAMER and ANDERSEN (1980). These authors detected mRNA in the *pho80* mutant regardless of whether cells were grown in high-P<sub>i</sub> or low-P<sub>i</sub> medium. On the basis of their studies, we speculate that the cAMP-dependent protein kinase exerts its function at the transcriptional stage in the synthesis of repressible acid phosphatase, although there remains the possibility that it works at the posttranscriptional level. To confirm the transcriptional regulation of repressible acid phosphatase by cAMP-dependent protein kinase, further work is required to analyze the RNA transcription from the *PHO5* gene in the *cyr1-2* mutant.

Studies on chromatin structure and its relationship to transcriptional activity have revealed that active genes have a conformation different from that of inactive genes in higher eukaryotes (WEINTRAUB and GROUDINE 1976) and yeast (SLEDZIEWSKI and YOUNG 1982; BERGMAN and KRAMER 1983). Phosphorylation of chromosomal proteins has been implicated in determining the ultrastructure of chromatin and in regulating the availability of genetic sequences for transcription in many biological systems (ISENBERG 1979). If phosphorylative modification of chromosomal proteins is related to the regulation of specific gene expression, selective phosphorylative modifications of nuclear protein might be responsible for changes of gene activity. A possible explanation of these data is that phosphorylative changes of nuclear protein by the cAMP-dependent protein kinase may modify chromatin structure in such a way as to allow derepression of specific enzyme synthesis.

We thank A. TOH-E and Y. KANEKO for their valuable discussions and for yeast strains. We also thank J. ISHIYAMA and H. MORI of the Central Research Laboratory of Kikkoman Company for their gift of cAMP.

#### LITERATURE CITED

- BERGMAN, L. W. and R. A. KRAMER, 1983 Modulation of chromatin structure associated with derepression of the acid phosphatase gene of *Saccharomyces cerevisiae*. *J. Biol. Chem.* **258**: 7223–7227.
- BOSTIAN, K. A., J. M. LEMIRE, L. E. CANNON and H. O. HALVORSON, 1980 *In vitro* synthesis of repressible yeast acid phosphatase: identification of multiple mRNAs and products. *Proc. Natl. Acad. Sci. USA* **77**: 4504–4508.

- CHRAPKIEWICZ, N. B., E. G. BEALE and D. K. GRANNER, 1982 Induction of the messenger ribonucleic acid coding for phosphoenolpyruvate carboxykinase in H4-II-E cells. *J. Biol. Chem.* **257**: 14428–14432.
- ISENBERG, I., 1979 Histones. *Annu. Rev. Biochem.* **48**: 159–191.
- KANEKO, Y., A. TOH-E and Y. OSHIMA, 1982 Identification of the genetic locus for the structural gene and a new regulatory gene for the synthesis of repressible alkaline phosphatase in *Saccharomyces cerevisiae*. *Mol. Cell. Biol.* **2**: 127–137.
- KRAMER, R. A. and N. ANDERSEN, 1980 Isolation of yeast genes with mRNA levels controlled by phosphate concentration. *Proc. Natl. Acad. Sci. USA* **77**: 6541–6545.
- LOWRY, O. H., N. J. ROSEBROUGH, A. L. FARR and R. J. RANDALL, 1951 Protein measurement with the Folin phenol reagent. *J. Biol. Chem.* **193**: 265–275.
- MATSUMOTO, K., A. TOH-E and Y. OSHIMA, 1978 Genetic control of galactokinase synthesis in *Saccharomyces cerevisiae*: evidence for constitutive expression of the positive regulatory gene *gal4*. *J. Bacteriol.* **134**: 446–457.
- MATSUMOTO, K., A. TOH-E and Y. OSHIMA, 1981 Isolation and characterization of dominant mutations resistant to carbon catabolite repression of galactokinase synthesis in *Saccharomyces cerevisiae*. *Mol. Cell. Biol.* **1**: 83–93.
- MATSUMOTO, K., I. UNO and T. ISHIKAWA, 1983 Control of cell division in *Saccharomyces cerevisiae* mutants defective in adenylate cyclase and cyclic AMP-dependent protein kinase. *Exp. Cell Res.* **146**: 151–161.
- MATSUMOTO, K., I. UNO and T. ISHIKAWA, 1984 Identification of the structural gene and non-sense alleles for adenylate cyclase in *Saccharomyces cerevisiae*. *J. Bacteriol.* **157**: 277–282.
- MATSUMOTO, K., I. UNO, T. ISHIKAWA and Y. OSHIMA, 1983 Cyclic AMP may not be involved in catabolite repression in *Saccharomyces cerevisiae*: evidence from mutants unable to synthesize it. *J. Bacteriol.* **156**: 898–900.
- MATSUMOTO, K., I. UNO, Y. OSHIMA and T. ISHIKAWA, 1982a Isolation and characterization of yeast mutants deficient in adenylate cyclase and cAMP-dependent protein kinase. *Proc. Natl. Acad. Sci. USA* **79**: 2355–2359.
- MATSUMOTO, K., I. UNO, A. TOH-E, T. ISHIKAWA and Y. OSHIMA, 1982b Cyclic AMP may not be involved in catabolite repression in *Saccharomyces cerevisiae*: evidence from mutants capable of utilizing it as an adenine source. *J. Bacteriol.* **150**: 277–285.
- MIZUNAGA, T., 1980 Regulation of acid phosphatase synthesis in baker's yeast protoplast by phosphate compounds. *Agric. Biol. Chem.* **44**: 2021–2027.
- NOGI, Y., K. MATSUMOTO, A. TOH-E and Y. OSHIMA, 1977 Interaction of super-repressible and dominant constitutive mutations for the synthesis of galactose pathway enzymes in *Saccharomyces cerevisiae*. *Mol. Gen. Genet.* **152**: 137–144.
- PASTAN, I. and S. ADHYA, 1976 Cyclic adenosine 3',5'-monophosphate in *Escherichia coli*. *Bacteriol. Rev.* **40**: 527–551.
- ROBISON, G. A., R. BUTCHER and E. W. SUTHERLAND, 1971 *Cyclic AMP*. Academic Press, New York.
- ROGERS, D. T., J. M. LEMIRE and K. A. BOSTIAN, 1982 Acid phosphatase polypeptides in *Saccharomyces cerevisiae* are encoded by a differently regulated multigene family. *Proc. Natl. Acad. Sci. USA* **79**: 2157–2161.
- RUBIN, G. M., 1974 Three forms of the 5.8-S ribosomal RNA species in *Saccharomyces cerevisiae*. *Eur. J. Biochem.* **41**: 197–202.
- SLEDZIEWSKI, A. and E. T. YOUNG, 1982 Chromatin conformational changes accompany transcriptional activation of a glucose-repressed gene in *Saccharomyces cerevisiae*. *Proc. Natl. Acad. Sci. USA* **79**: 253–256.

- TOH-E, A., 1980 Genetic mapping of the *pho2*, *PHO82-pho4* and *pho85* loci of yeast. *Genetics* **94**: 929–932.
- TOH-E, A., S. INOUE and Y. OSHIMA, 1981 Structure and function of the *PHO82-pho4* locus controlling the synthesis of repressible acid phosphatase of *Saccharomyces cerevisiae*. *J. Bacteriol.* **145**: 221–232.
- TOH-E, A., S. KAKIMOTO and Y. OSHIMA, 1975 Genes coding for the structure of the acid phosphatase in *Saccharomyces cerevisiae*. *Mol. Gen. Genet.* **143**: 65–70.
- TOH-E, A. and Y. OSHIMA, 1974 Characterization of a dominant, constitutive mutation, *PHOO*, for the repressible acid phosphatase synthesis in *Saccharomyces cerevisiae*. *J. Bacteriol.* **120**: 608–617.
- TOH-E, A., Y. UEDA, S. KAKIMOTO and Y. OSHIMA, 1973 Isolation and characterization of acid phosphatase mutants in *Saccharomyces cerevisiae*. *J. Bacteriol.* **113**: 727–738.
- UNO, I., K. MATSUMOTO and T. ISHIKAWA, 1982 Characterization of cyclic AMP-requiring yeast mutants altered in the regulatory subunit of protein kinase. *J. Biol. Chem.* **257**: 14110–14115.
- UNO, I., H. NYUNOYA and T. ISHIKAWA, 1981 Effects of 2-deoxy-D-glucose and quinidine on the fruiting body formation in *Coprinus macrorhizus*. *J. Gen. Appl. Microbiol.* **27**: 219–228.
- WALTER, U., I. UNO, A. Y.-C. LIU and P. GREENGARD, 1977 Study of autophosphorylation of isoenzymes of cyclic AMP-dependent protein kinases. *J. Biol. Chem.* **252**: 6588–6590.
- WEINTRAUB, H. and M. GROUDINE, 1976 Chromosomal subunits in active genes have an altered conformation. *Science* **193**: 848–856.
- WILLIAMS, J. G., A. S. TSANG and H. MAHBUBANI, 1980 A change in the rate of transcription of a eukaryotic gene in response to cyclic AMP. *Proc. Natl. Acad. Sci. USA* **77**: 7171–7175.

Corresponding editor: I. HERSKOWITZ
